# Supplementary material for: Effects of a Simulated Acute Oil Spillage on Bacterial Communities from Arctic and Antarctic Marine Sediments
Source: PubMed Central journal article supplement (PMC6956123; doi:10.3390/microorganisms7120632), 2019-11-30
Supplement: microorganisms-07-00632-s001.pdf [file microorganisms-07-00632-s001.pdf]

## Supplementary Materials

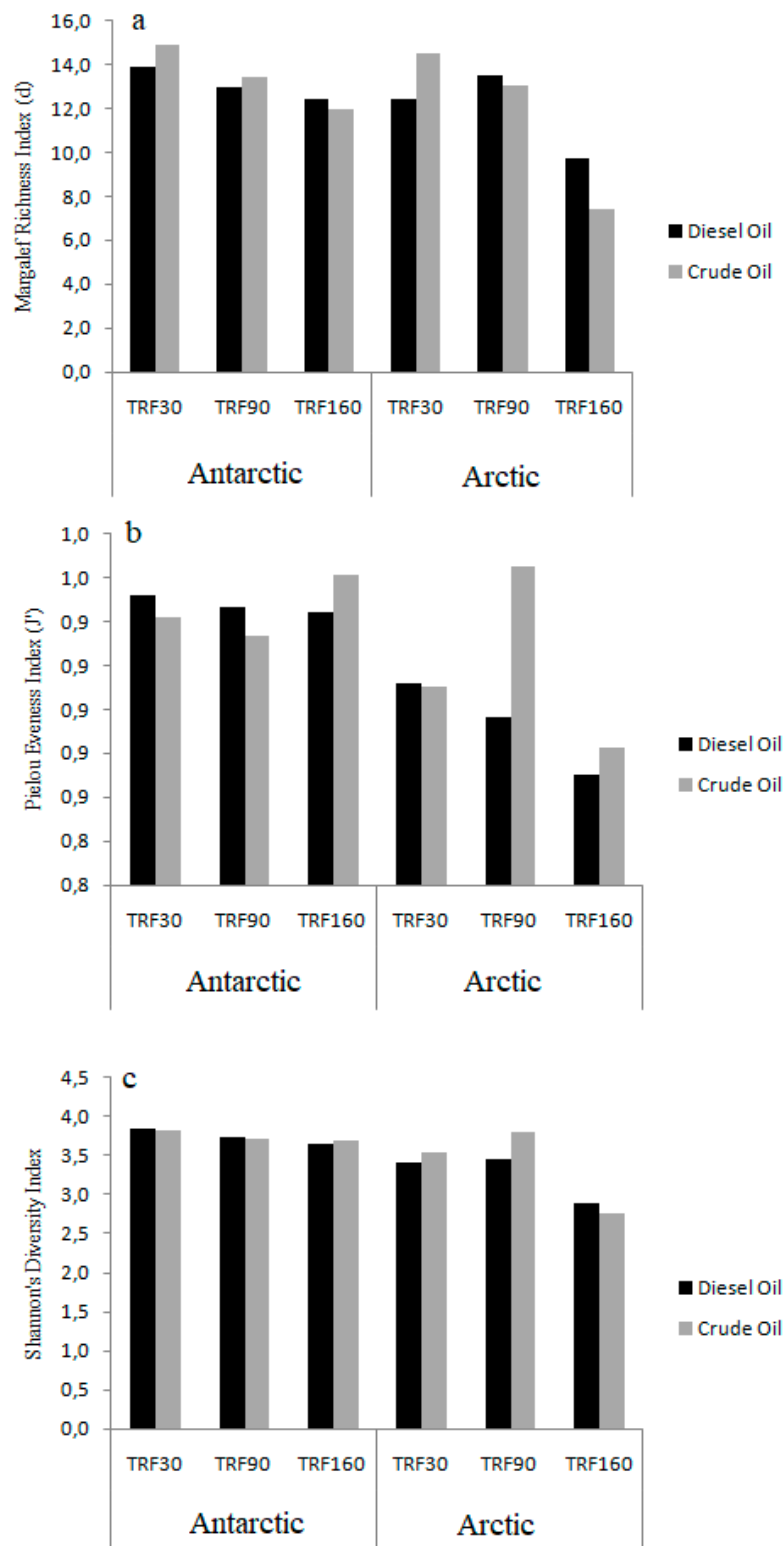

**Figure 1.** Richness, diversity and evenness indexes calculated from the T-RFLP data obtained from Arctic and Antarctic microcosms.

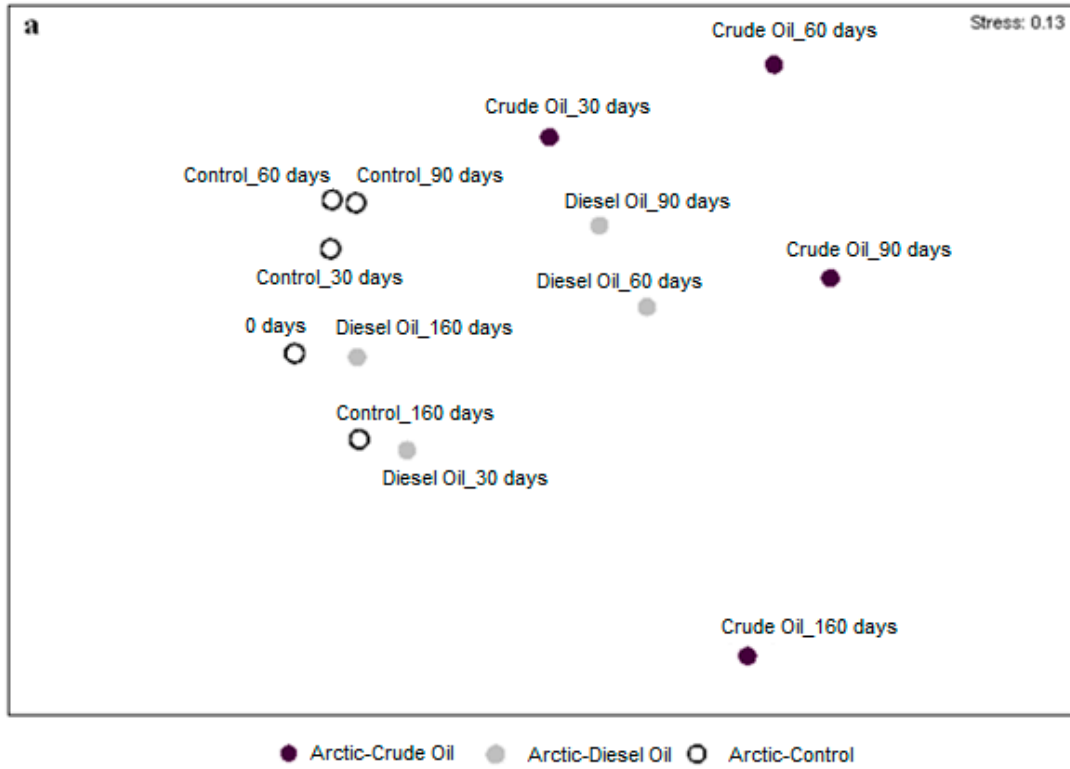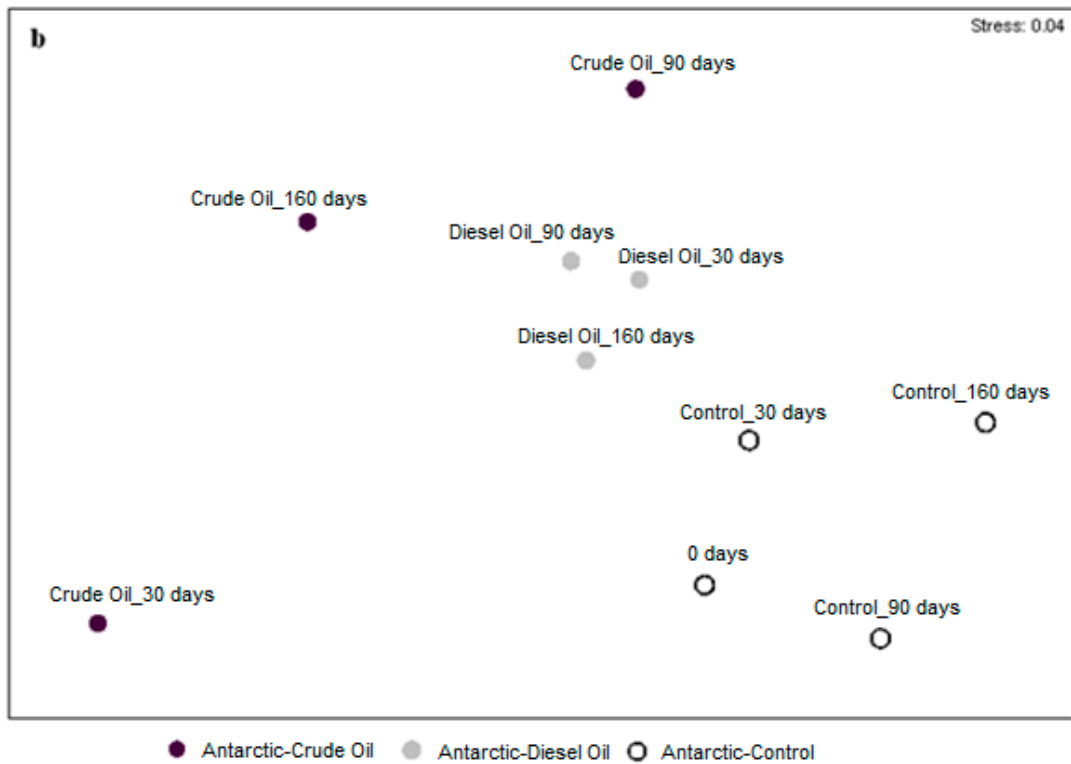

**Figure 2.** Non-metric multidimensional scaling (nMDS) computed by Bray-Curtis similarities calculated on T-RFLP results obtained from a) Arctic and b) Antarctic microcosms.

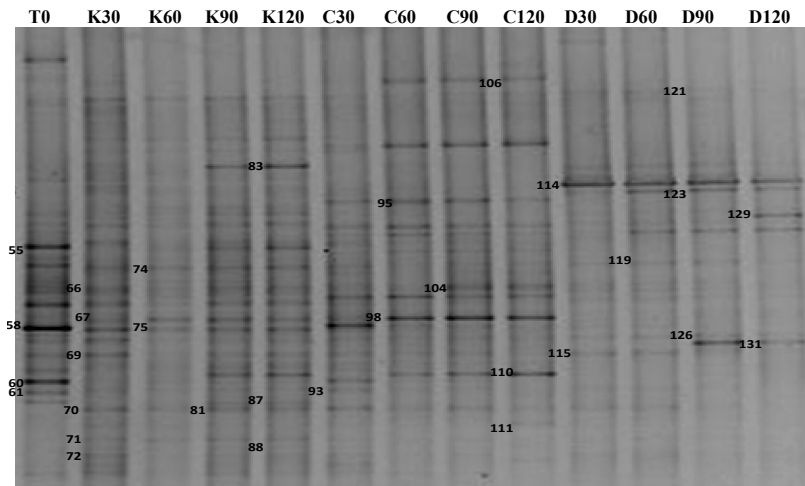

**Figure 3.** DGGE profiles of the representative 16S rDNA fragments obtained from Arctic sediment bacterial communities at different time of incubation (30, 60, 90 or 160 days). K, control; C, crude oil; D, diesel oil. The Arabic numbers indicate the DGGE bands that were sequenced.

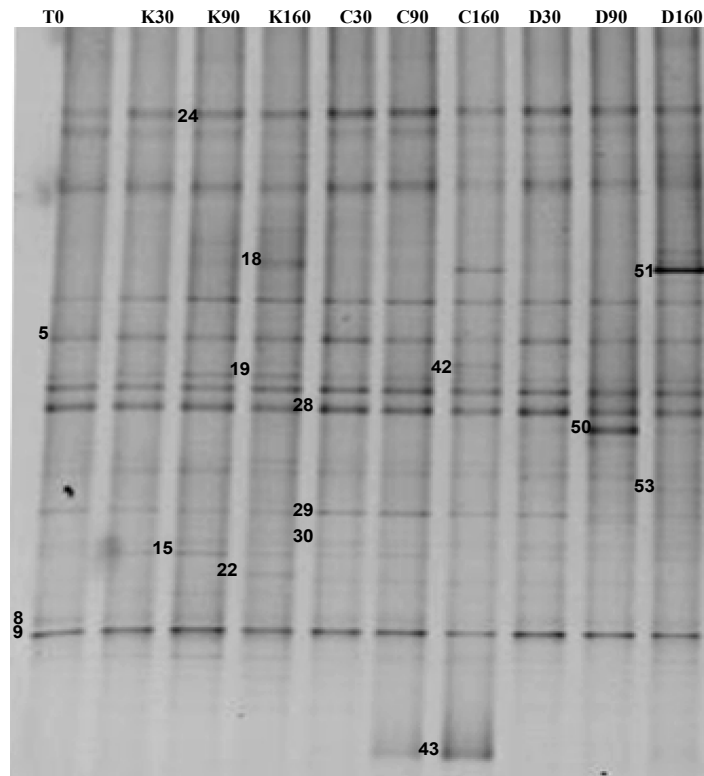

**Figure 4.** DGGE profiles of the representative 16S rDNA fragments obtained from Antarctic sediment bacterial communities at different incubation time (30, 90 or 160 days). K, control; C, crude oil; D, diesel oil. The Arabic numbers indicate the DGGE bands that were sequenced.
